# Supplementary material
Source: PubMed Central journal article supplement (PMC6697342)
Supplement: mmc1.pdf [file mmc1.pdf]

YMTHE, Volume 27

## **Supplemental Information**

**Lipidoid-siRNA Nanoparticle-Mediated**

**IL-1 $\beta$  Gene Silencing for Systemic Arthritis**

**Therapy in a Mouse Model**

**Ping Song, Chuanxu Yang, Jesper Skovhus Thomsen, Frederik Dagnæs-Hansen, Maria Jakobsen, Annemarie Brüel, Bent Deleuran, and Jørgen Kjems**

## Supplemental Information

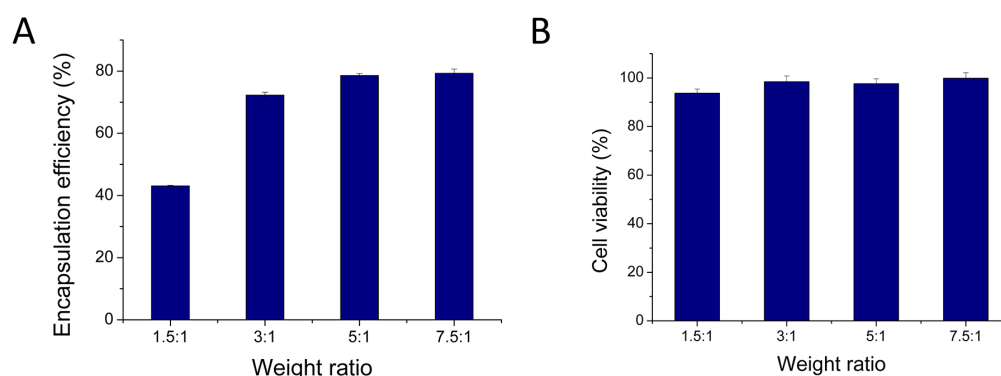

Figure S1. (A) Encapsulation efficiency of FS14-NP for siRNA at different weight ratios of S14 to siRNA, mean  $\pm$  SD (n=3); (B) Cell viability of FS14-NP/siRNA at indicated weight ratios after 24h, mean  $\pm$  SD (n=5)

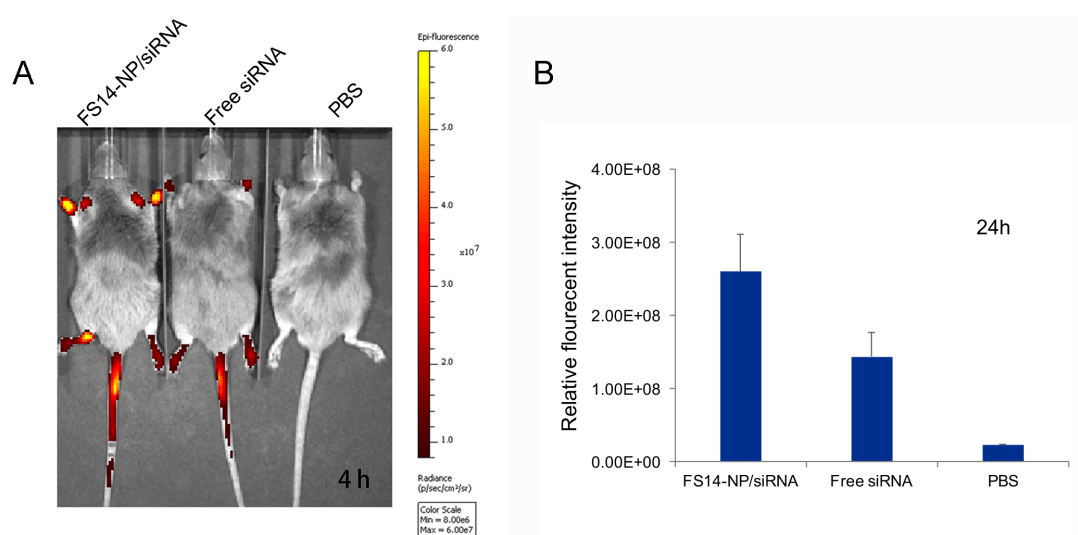

Figure S2. FS14-NP/siRNA accumulation in inflammatory joints. (A) In-vivo imaging showing accumulation of FS14-NP/Cy5.5-siRNA in arthritic joints at 4 h post injection. (B) Quantitative evaluation of the relative fluorescent intensity of the paws after 24 hours. CAIA mice were injected i.v. with FS14-NP/Cy5.5-siRNA (FS14-NP/siRNA), Free Cy5.5-siRNA (Free siRNA) and PBS. The *in vivo* accumulation of FS14-NP/siRNA in arthritic joints was imaged by IVIS at 4 h and 24 h post injection on day 7.

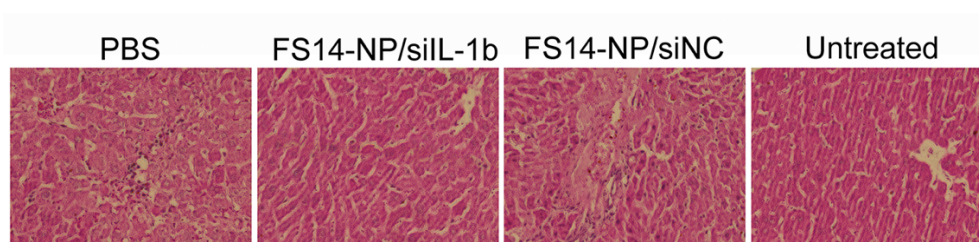

Figure S3. Representative images of H&E staining of liver sections from mice treated with PBS, FS14-NP/siIL-1b, FS14-NP/siNC and comparing to untreated mice.

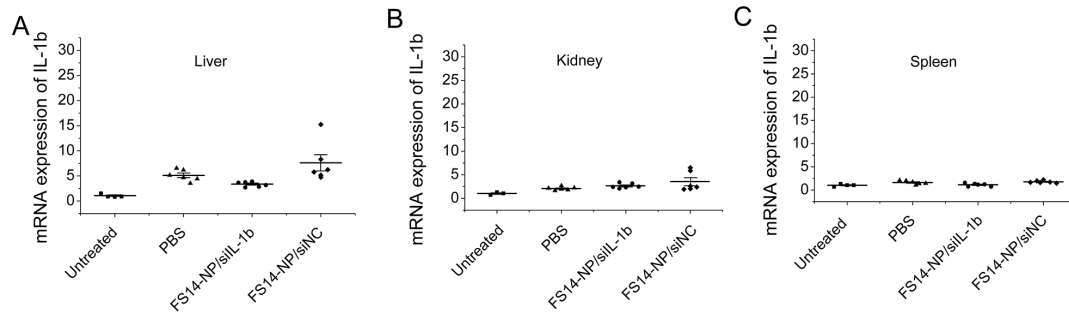

Figure S4. The expression of IL-1 $\beta$  in non-target tissues. Organs were isolated at day 9 and homogenized, the mRNA expression of IL-1 $\beta$  in (A) liver, (B) kidney and (C) spleen were measured by real-time PCR and normalized to housekeeping gene GAPDH.

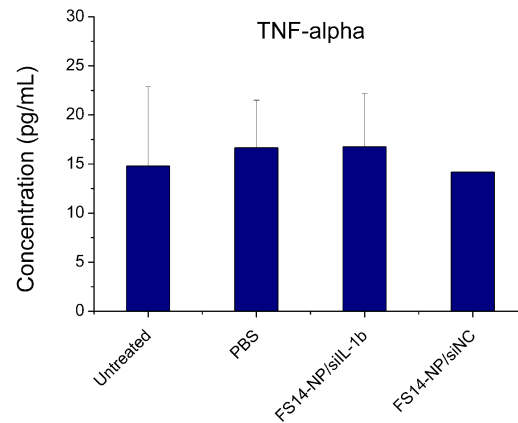

Figure S5. Systemic expression of TNF- $\alpha$ . The expression TNF- $\alpha$  in serum was measured in serum using an Inflammatory Cytokine 4-Plex Mouse Panel kit. Data are presented as mean  $\pm$  SD (n=6).

Table S1. Primers used for qPCR in the study.

| Target (mouse) | Sequence                          |
|----------------|-----------------------------------|
| IL-1 $\beta$   | F 5'- CAGGCTCCGAGATGAACAAC -3'    |
|                | R 5'- GGTGGAGAGCTTTCAGCTCATA -3'  |
| TNF- $\alpha$  | F 5'- GTAGCCCACGTCGTAGGTAA -3'    |
|                | R 5'- ATCGGCTGGCACCAGT -3'        |
| MMP-3          | F 5'- ATGAAAATGAAGGGTCTTCCGG -3'  |
|                | R 5'- GCAGAAGCTCCATACCAGCA -3'    |
| MMP-13         | F 5'- ATGCATTGAGCTATCCTGGCCA -3'  |
|                | R 5'- AAGATTGCATTTCTCGGAGCCTG -3' |
| GAPDH          | F 5'- GACGGCCGCATCTTCTTG -3'      |
|                | R 5'- GCGCCCAATACGGCCAAATC -3'    |
